# Supplementary material for: Regioselective synthesis of 1,2,3-triazole derivatives via 1,3-dipolar cycloaddition reactions in waterElectronic supplementary information (ESI) available: experimental procedures, elemental analyses and spectroscopic data. See http://www.rsc.org/suppdata/cc/b3/b307084k/
Source: Royal Society of Chemistry journal article supplement (doi:10.1039/b307084k), 2003-01-01
Supplement: b307084k.doc [file b307084k.doc]

**Communication Ref: B307084K**

**Electronic Supplementary Information**

Regioselective Synthesis of 1, 2, 3-Triazole Derivatives via 1, 3-Dipolar Cycloaddition Reactions in Water

Zhong-Xia Wang* and Hua-Li Qin

*Department of Chemistry, University of Science and Technology of China, Hefei, Anhui 230026, P. R. China. Fax: +86 551 3631760; Tel: +86 551 3603043. E-mail: zxwang@ustc.edu.cn*

**Experimental details and analytical data**

1H and 13C NMR spectra were recorded on a Bruker av400 NMR or a Bruker av300 NMR spectrometer at ambient temperature and the chemical shifts of 1H and 13C{1H} NMR spectra are referenced to internal solvent resonances. IR spectra were recorded on a Bruker VECTOR-22 instrument. Elemental analyses were performed by the Analytical Center of University of Science and Technology of China. Melting points were uncorrected.

**1. Synthesis of 1,2,3-triazole derivatives by reaction between an alkyne and an azide in hot water**

**Typical procedure:** A mixture of azidobenzene (0.60 g, 5.04 mmol), phenylacetylene (0.51 g, 5.00 mmol) and distilled water (20 ml) in a round-bottomed flask was heated at 85 ºC (bath temperature) for 24 h with stirring. The mixture was cooled to room temperature and then filtered. The solid was washed with distilled water and dried in the air. The white product was identified as 1,4-diphenyl-1,2,3-triazole (0.90 g, 81%). The other 1,2,3-triazoles were obtained following the same procedure (reaction temperature is shown in Table 1). The regioisomers were not isolated and the ratio of the isomers was determined by 1H NMR spectra. The physical data and elemental analytical data of the compounds are listed in Table 1, the 1H and 13C{1H} NMR and IR spectral data are in Table 2.

**Table 1**. Physical data and elemental analytical data of the compounds obtained by reaction between RN3 and R1CCR2

| entry | reactants RN3 + R1CCR2 | | | reaction conditions | products (ratio) | yield (%) | colour | m.p. (ºC) | elemental analysis (calc.)1 | | |
| --- | --- | --- | --- | --- | --- | --- | --- | --- | --- | --- | --- |
| R | R1 | R2 | C | H | N |
| 1 | Ph | H | Ph | 85 ºC, 24 h | **3a** | 81 | colourless | 181-183 2 | 75.50(76.00) | 5.11(5.01) | 18.94(18.99) |
| 2 | Ph | H | p-MeC6H4 | 85 ºC, 24 h | **3b** | 81 | colourless | 160-162 | 76.34(76.57) | 5.45(5.57) | 17.73(17.86) |
| 3 | *p*-MeC6H4 | H | Ph | 85 ºC, 24 h | **3c** | 38 | colourless | 170-171 | 76.53(76.57) | 5.46(5.57) | 17.54(17.86) |
| 120 ºC, 24 h | 85 |
| 4 | *p*-MeOC6H4 | H | Ph | 85 ºC, 24 h | **3d** | 97 | colourless | 160-161 | 71.28(71.70) | 5.20(5.21) | 16.32(16.72) |
| 5 | *p*-ClC6H4 | H | Ph | 85 ºC, 24 h | **3e** | 71 | colourless | 204-205 | 65.90(65.76) | 3.85(3.94) | 16.07(16.43) |
| 120 ºC, 24 h | 86 |
| 6 | *m*-NO2C6H4 | H | Ph | 85 ºC, 24 h | **3f** | 96 | pale yellow | 198-200 | 63.18(63.15) | 3.65(3.79) | 20.85(21.04) |
| 7 | *m*-NO2C6H4 | H | p-MeC6H4 | 85 ºC, 24 h | **3g** | 90 | pale yellow | 207-208 | 64.16(64.28) | 4.26(4.32) | 19.56(19.99) |
| 8 | *m*-NO2C6H4 | H | CH2OC(O)Me | 85 ºC, 24 h | **3h** | 89 | white | 105-106 | 50.59(50.38) | 3.68(3.84) | 21.03(21.37) |
| 9 | *m*-NO2C6H4 | H | CO2Et | 85 ºC, 24 h | **3i** | 95 | pale yellow | 140-142 | 50.60(50.38) | 4.01(3.84) | 21.39(21.37) |
| 10 | Ph | H | CH2OC(O)Me | 120 ºC, 24 h | **3j**+**4j** (15:1) | 63 | white |  | 60.57(60.82) | 4.96(5.10) | 19.02(19.34) |
| 11 | Ph | H | CO2Et | 85 ºC, 24 h | **3k**+**4k** (4.5:1) | 91 | white |  | 60.72(60.82) | 4.91(5.10) | 19.17(19.34) |
| 120 ºC, 24 h | **3k**+**4k** (5.6:1) | 90 |
| 12 | *p*-MeC6H4 | H | CO2Et | 85 ºC, 24 h | **3l**+**4l** (3:1) | 81 | white |  | 62.39(62.33) | 5.48(5.67) | 18.05(18.17) |
| 120 ºC, 24 h | **3l**+**4l** (5:1) | 90 |
| 13 | *p*-ClC6H4 | H | CH2OC(O)Me | 85 ºC, 24 h | **3m**+**4m** (2.5:1) | 93 | colourless |  | 52.53(52.50) | 3.88(4.00) | 16.39(16.70) |
| 120 ºC, 24 h | **3m**+**4m** (3:1) | 91 |
| 14 | *p*-ClC6H4 | H | CO2Et | 85 ºC, 24 h | **3n**+**4n** (5.2:1) | 86 | colourless |  | 52.56(52.50) | 3.93(4.00) | 16.36(16.70) |
| 120 ºC, 24 h | **3n**+**4n** (4:1) | 87 |
| 15 | *p*-MeOC6H4 | H | CH2OC(O)Me | 85 ºC, 24 h | **3o**+**4o** (7.3:1) | 58 | pale brown |  | 58.25(58.29) | 5.34(5.30) | 16.53(16.99) |
| 120 ºC, 24 h | **3o**+**4o** (28.6:1) | 63 |
| 16 | PhCH2 | H | CH2NEt2 | 120 ºC, 24 h | **3p**+**4p** (9:1) | 71 | yellow oil |  |  |  |  |
| 17 | Ad | H | Ph |  | **3q** | 86 | white solid |  |  |  |  |
| 18 | Ph | Ph | Ph | 120 ºC, 24 h | **3r** | 72 | white | 232-233 3 |  |  |  |
| 19 | *p*-MeC6H4 | Ph | Ph | 120 ºC, 24 h | **3s** | 36 | white | 201-202 | 80.58(81.00) | 5.35(5.50) | 13.17(13.49) |
| 20 | *m*-NO2C6H4 | Ph | Ph | 85 ºC, 24 h | **3t** | 92 | white | 138-139 | 69.77(70.17) | 3.91(4.12) | 16.00(16.37) |

**Table 2**. 1H, 13C{1H} NMR and IR spectral data for compounds **3a**-**3t** and **4j**-**4p**

| entry | compound | 1H NMR | 13C{1H} NMR | IR(KBr),  (cm1) |
| --- | --- | --- | --- | --- |
| 1 | **3a** | 7.13-7.49 (m, 7H, Ph), 7.70-7.86 (m, 3H, Ph), 8.14 (s, 1H, CH). | 117.74, 126.02, 128.56, 128.91, 129.06, 129.36, 129.92, 130.44, 137.26, 148.58. | 3120m, 3096m, 3054m, 1655w, 1598m, 1556w, 1504s, 1481s, 1465m, 1451m, 1415m, 1239m, 1228s, 1074m, 1041s, 1026m, 995m, 972w, 910m, 827m, 758vs, 708m, 689vs, 659m |
| 2 | **3b** | 2.40 (s, 3H, Me), 7.27 (s, 2H, Ar), 7.46 (d, *J* = 7.04 Hz, 1H, Ar), 7.53-7.57 (m, 2H, Ar), 7.81(s, 4H, Ar), 8.16 (s, 1H, CH). | 21.42, 117.43, 120.64, 125.94, 127.47, 128.85, 129.73, 129.88, 137.25, 138.49, 148.55. | 3108m, 3061w, 2914w, 1655w, 1598m, 1560w, 1508m, 1494s, 1463m, 1410m, 1238s, 1228s, 1195w, 1154w, 1109w, 1073w, 1042s, 994m, 970m, 906m, 833w, 814vs, 756vs, 721w, 687s, 661w. |
| 3 | **3c** | 2.43 (s, 3H, Me), 7.31-7.39 (m, 3H, Ar), 7.46 (t, *J* = 7.22 Hz, 2H, Ar), 7.66 (d, *J* = 8.19 Hz, 2H, Ar), 7.91 (d, *J* = 7.31 Hz, 2H, Ar), 8.16 (s, 1H, CH). | 21.24, 117.85, 120.55, 125.96, 128.48, 128.85, 129.03, 130.39, 134.86, 139.02, 148.34. | 3121s, 3098m, 3052m, 2916m, 1654m, 1609m, 1555m, 1520vs, 1482s, 1455s, 1431m, 1409m, 1374m, 1229vs, 1197w, 1111w, 1095w, 1073m, 1043vs, 1027s, 995s, 913m, 818vs, 763vs, 706s, 693vs. |
| 4 | **3d** | 3.87 (s, 3H, Me), 7.03 (d, *J* = 8.95 Hz, 2H, Ar), 7.37 (d, *J* = 7.32 Hz, 1H, Ar), 7.45 (t, *J* = 7.13 Hz, 2H, Ar), 7.68 (d, *J* = 8.97 Hz, 2H, Ar), 7.90 (d, *J* = 7.12 Hz, 2H, Ar), 8.11 (s, 1H, CH). | 55.72, 114.92, 117.97, 122.27, 125.94, 128.41, 128.99, 130.65, 148.32, 159.98, 186.43. | 3127m, 3096w, 3043vw, 2960w, 2936w, 1610w, 1519vs, 1481m, 1463m, 1440m, 1303m, 1248s, 1234s, 1184m, 1172m, 1109m, 1074w, 1045s, 1033s, 992m, 833s, 816m, 768s, 693s. |
| 5 | **3e** | 7.38-7.54 (m, 5H, Ph), 7.76 (d, *J* = 8.93 Hz, 2H, C6H4), 7.91 (d, *J* = 8.50 Hz, 2H, C6H4), 8.17 (s, 1H, CH). | 122.67, 122.93, 126.52, 127.98, 129.14, 129.80, 130.19, 130.46, 130.80. | 3120m, 3097m, 1652w, 1554w, 1503vs, 1481s, 1454m, 1431w, 1405w, 1228s, 1097s, 1072w, 1040s, 1027w, 1016w, 993s, 918w, 833vs, 822s, 768vs, 707m, 694s. |
| 6 | **3f** | 7.44-7.52 (m, 3H, Ar), 7.79 (t, *J* = 8.20 Hz, 1H, C6H4), 7.93 (d, *J* = 7.49 Hz, 2H, C6H4), 8.26-8.35 (m, 3H, Ar), 8.66 (s, 1H, CH). | 115.26, 117.42, 123.33, 126.14, 129.04, 129.21, 129.74, 131.19, 149.14, 149.34. | 3139m, 3089m, 1610m, 1534vs, 1497m, 1455m, 1415m, 1348vs, 1290w, 1252w, 1233s, 1191w, 1100m, 1045s, 1010m, 916w, 885m, 870m, 807m, 763s, 745m, 733s, 690s, 669m. |
| 7 | **3g** | 2.41 (s, 3H, Me), 7.23-7.31 (m, 2H, Ar), 7.75-7.83 (m, 3H, Ar), 8.25-8.33 (m, 3H, Ar), 8.64 (s, 1H, CH). | 21.47, 115.23, 117.01, 123.21, 127.00, 129.88, 131.12, 138.06, 139.02, 149.24, 149.46. | 3144m, 3095w, 2919w, 1619w, 1535vs, 1503w, 1492m, 1450w, 1408w, 1348vs, 1273w, 1230s, 1197w, 1103w, 1077w, 1044s, 1010m, 885m, 870m, 829m, 802s, 743s, 734s, 669m. |
| 8 | **3h** | 2.12 (s, 3H, Me), 5.32 (s, 2H, CH2), 7.77 (t, *J* = 8.11 Hz, 1H, C6H4), 8.17 (m, 2H, C6H4), 8.32 (t, *J* = 6.99 Hz, 1H, C6H4), 8.60 (s, 1H, CH). | 20.91, 57.47, 115.45, 122.14, 123.45, 126.09, 131.16, 137.72, 144.53, 149.09, 170.95. | 3132m, 3088m, 2979w, 1722vs, 1597w, 1536vs, 1494m, 1435m, 1382m, 1347vs, 1296w, 1270s, 1244vs, 1225vs, 1185s, 1101w, 1077w, 1039s, 994s, 957w, 896s, 870m, 856m, 832m, 806m, 782s, 736s, 691w, 669m. |
| 9 | **3i** | 1.45 (t, *J* = 7.12 Hz, 3H, Me), 4.49 (t, *J* = 7.08 Hz, 2H, CH2), 7.81(t, *J* = 8.18 Hz, 1H, C6H4), 8.22 (d, *J* = 8.02 Hz, 1H, C6H4), 8.37 (d, *J* = 8.22 Hz, 1H, C6H4), 8.65 (s, 2H, C6H4+CH). | 14.42, 61.89, 115.79, 124.10, 125.63, 126.38, 131.39, 137.20, 141.59, 149.09, 160.28. | 3138s, 3105s, 2991w, 1714vs, 1594m, 1531vs, 1495m, 1474m, 1450w, 1352vs, 1315m, 1289s, 1266vs, 1176s, 1109m, 1037vs, 981m, 877s, 869s, 840w, 808m, 774s, 737vs, 665s. |
| 10 | **3j**+**4j** | **3j**: 2.10 (s, 3H, Me), 5.29 (s, 2H, CH2), 7.42-7.49 (m, 3H, Ph), 7.72 (d, *J* = 7.67 Hz, 2H, Ph), 8.05 (s 1H, CH). **4j**: 2.07 (s, Me), 5.14 (s, CH2), 7.87 (s, CH). The signals of phenyl overlap those of **3j**. | **3j**: 20.93, 57.66, 120.72, 122.13, 129.01, 129.75, 137.03, 143.68, 170.92. The signals of **4j** are too weak to distinguish. | 3146m, 3100w, 2964w, 1728vs, 1599s, 1560w, 1506s, 1468m, 1448m, 1426m, 1390m, 1369m, 1350m, 1271s, 1238vs, 1195m, 1051s, 1037s, 1001m, 986s, 956s, 904w, 845w, 826m, 757vs, 708m, 688s, 677m. |
| 11 | **3k**+**4k** | **3k**: 1.44 (t, *J* = 7.07 Hz, 3H, Me), 4.46 (q, *J* = 7.00 Hz, 2H, CH2), 7.49-7.58 (m, 3H, Ph), 7.75 (d, *J* = 7.86 Hz, 2H, Ph), 8.51 (s, 1H, CH). **4k**: 1.27 (t, *J* = 7.07 Hz, Me), 4.28 (q, *J* = 7.07 Hz,, CH2), 8.26 (s, CH). The signals of phenyl overlap those of **3k**. | **3k**: 14.39, 61.52, 120.91, 125.60, 129.58, 130.01, 136.51, 140.96, 160.70. | 3141s, 3078w, 2984w, 2909vw, 1706vs, 1597m, 1546s, 1509s, 1468m, 1374m, 1348m, 1319m, 1269vs, 1196m, 1172s, 1040vs, 985m, 869m, 777s, 766vs, 688s, 632w, 614w. |
| 12 | **3l**+**4l** | **3l**: 1.44 (t, *J* = 7.01 Hz, 3H, Me), 2.43 (s, 3H, Me), 4.46 (q, *J* = 6.97 Hz, 2H, CH2), 7.34 (d, *J* = 7.48 Hz, 2H, C6H4), 7.62 (d, *J* = 8.07 Hz, 2H, C6H4), 8.46 (s, 1H, CH). **4l**: 1.29 (t, *J* = 7.04 Hz, Me), 4.29 (q, *J* = 7.08 Hz,, CH2), 8.25 (s, CH). The signals of the C6H4 and the methyl on aryl ring overlap corresponding those of **3l**. | **3l**: 14.44, 21.24, 61.53, 120.84, 125.57, 129.57, 130.53, 134.26, 139.87, 160.81. **4l**: 14.11, 21.40, 61.93, 125.73, 140.41, 140.87, 157.95. | 3146m, 3085w, 2982m, 1718vs, 1552s, 1519m, 1473w, 1410w, 1369m, 1344m, 1309m, 1292m, 1269s, 1192m, 1161m, 1128w, 1042s, 1017m, 990w, 951w, 827vs, 771s, 696w. |
| 13 | **3m**+**4m** | **3m**: 2.10 (s, 3H, Me), 5.28 (s, 2H, CH2), 7.49 (d, *J* = 8.65 Hz, 2H, C6H4), 7.68 (d, *J* = 8.68 Hz, 2H, C6H4), 8.03 (s, 1H, CH). **4m**: 2.08 (s, 3H, Me), 5.13 (s, 2H, CH2), 7.48-7.56 (m, 4H, C6H4), 7.87 (s, 1H, CH). | **3m**+**4m**: 20.90, 53.83, 57.57, 121.85, 122.03, 126.22, 130.06, 134.84, 135.50, 143.96, 170.93. | 3145m, 3108w, 2957vw, 1737vs, 1566w, 1504vs, 1162vw, 1439w, 1410w, 1379w, 1366m, 1343w, 1255vs, 1233vs, 1098s, 1056s, 1035s, 991m, 964w, 916w, 823vs, 771vw, 738w, 700vw, 621w, 606w. |
| 14 | **3n**+**4n** | **3n**: 1.42 (t, *J* = 6.95 Hz, 3H, Me), 4.45 (q, *J* = 6.98 Hz, 2H, CH2), 7.53 (d, *J* = 8.73 Hz, 2H, C6H4), 7.72 (d, *J* = 8.73 Hz, 2H, C6H4), 8.49 (s, 1H, CH). **4n**: 1.30 (t, *J* = 7.08 Hz, Me), 4.30 (q, *J* = 7.07 Hz,, CH2), 7.41-7.51 (m, C6H4), 8.26 (s, CH). | **3n**: 14.37, 61.60, 122.07, 125.51, 130.20, 135.49, 138.33, 141.12, 160.51. | 3150w, 3108w, 2979w, 2935vw, 1719vs, 1552s, 1501s, 1471w, 1441w, 1408m, 1369m, 1343m, 1284s, 1267vs, 1192m, 1164s, 1091s, 1041vs, 1011m, 986m, 837s, 770s, 742w, 694w. |
| 15 | **3o**+**4o** | **3o**: 2.09 (s, 3H, Me), 3.86 (s, 3H, OMe), 5.28 (s, 2H, CH2), 7.01 (d, *J* = 6.89 Hz, 2H, C6H4), 7.61 (d, *J* = 6.90 Hz, 2H, C6H4), 7.95 (s, 1H, CH). **4o**: 2.07 (s, 3H, Me), 3.88 (s, 3H, OMe), 5.10 (s, CH2), 7.04 (d, *J* = 6.72 Hz, 2H, C6H4), 7.43 (d, *J* = 6.70 Hz, 2H, C6H4), 7.84 (s, 1H, CH) | **3o**: 20.91, 55.68, 57.68, 114.88, 122.30, 126.46, 130.42, 143.41, 160.04, 170. 92. | 3144m, 3105w, 2964w, 1726vs, 1611w, 1562vw, 1520vs, 1460w, 1442w, 1378w, 1359w, 1305m, 1257vs, 1227s, 1201m, 1111w, 1049s, 1029s, 977w, 921w, 832s, 760w, 635w, 607w. |
| 16 | **3p**+**4p** | **3p**: 1.06 (t, *J* = 7.19 Hz, 6H, Et), 2.47 (q, *J* = 7.16 Hz, 4H, Et), 3.74 (s, 2H, CH2), 5.54 (s, 2H, CH2), 7.29-7.30 (m, 5H, Ph), 7.87 (s, 1H, CH). **4p**: 0.92 (t, *J* = 7.12 Hz, 6H, Et), 2.42 (q, *J* = 7.11 Hz, 4H, Et), 3.53 (s, 2H, CH2), 5.67 (s, 2H, CH2), 7.29-7.30 (m, 5H, Ph), 7.64 (s, 1H, CH). |  |  |
| 17 | **3q** | 1.74 (s, 6H, Adamantyl H), 2.22 (s, 6H, Adamantyl H), 7.19-7.26 (m, 1H, Ph), 7.34 (t, *J* = 7.29 Hz, 2H, Ph), 7.75 (s, 2H, Ph), 7.78 (s, 1H, CH). |  |  |
| 18 | **3r** | 7.19-7.38 (m, 13H, Ph), 7.59 (s, 2H, Ph). | 125.30, 127.49, 127.83, 128.04, 128.63, 129.09, 129.18, 129.27, 129.51, 130.31, 130.90, 133.80, 136.66, 144.91 | 3058m, 1593s, 1496vs, 1460m, 1444m, 1365s, 1264m, 1220w, 1126m, 1073m, 1060m, 1027m, 995s, 916w, 774vs, 758s, 696vs, 619w, 604s. |
| 19 | **3s** | 2.37 (s, 3H, Me), 7.18 (s, 5H, Ph), 7.20-7.39 (m, 7H, Ph+C6H4), 7.60 (s, 2H, C6H4). | 21.30, 125.15, 127.51, 127.98, 128.06, 128.61, 129.14，129.43, 129.84, 130.38, 131.07, 133.82, 134.29, 139.19, 144.83. | 3038w, 2924m, 1604w, 1516vs, 1477m, 1443m, 1368s, 1313w, 1293w, 1261m, 1215w, 1188w, 1127m, 1107w, 1063m, 1041w, 996s, 916m, 821vs, 803w, 778s, 769s, 733s, 697vs. |
| 20 | **3t** | 7.32-7.34 (m, 4H, Ph+ C6H4), 7.41-7.48(m, 3H, Ph+ C6H4), 7.55-7.62 (m, 4H, Ph+ C6H4),  7.67-7.70 (m, 1H, Ph+ C6H4),, 8.22-8.26 (m, 2H, Ph+ C6H4). | 120.02, 123.60, 127.17, 127.42, 128.40, 128.74, 129.69, 130.24, 130.33, 130.44, 133.81, 137.60, 148.55 | 3098w, 3056m, 1602w, 1536vs, 1504m, 1488m, 1446m, 1352vs, 1310m, 1280m, 1261m, 1215w, 1182w, 1123m, 1077m, 1063m, 1010m, 980w, 930w, 894m, 874m, 814s, 777vs, 737s, 729s, 698vs, 677s, 652w, 607m. |

Notes

1. The samples for elemental analysis were recrystalized from CHCl3 or a mixed solvent of acetone and CHCl3 (5:1).
2. Reported m.p. 182-183 ºC. (F. Moulin, *Helv. Chim. Acta*, 1952, **35**, 167.)
3. Reported m.p. 230.5-231 ºC. (F. Moulin, *Helv. Chim. Acta*, 1952, **35**, 167.)

**2. CuI-catalysed reaction between an azide and a terminal alkyne**

**(i) Reaction of *p*-ClC6H4N3 with MeC(O)OCH2CCH in a mixed solvent of water and *t*-butyl alcohol**

*p*-Chloroazidobenzene (0.389 g, 2.534 mmol) and MeC(O)OCH2CCH (0.250 g, 2.551 mmol) were dissolved in a 1:1 mixture of water and *t*-butyl alcohol (10 ml). Potassium ascorbate (0.25 mmol) prepared from ascorbic acid and KOH was added, followed by crystalline CuSO45H2O (7 mg, 0.028 mmol). The mixture was stirred at r.t. for 12 h and then diluted with water (50 ml). The precipitate was collected by filtration. After washing the precipitate with water (220 ml), it was dried in the air and then under vacuum to afford 0.482 g (75.6 %) of 1,4-disubstituted triazole as pale yellow solid. 1H NMR (CDCl3): 2.10 (s, 3H, Me), 5.29 (s, 2H, CH2), 7.50 (d, *J* = 8.60 Hz, 2H, C6H4), 7.69 (d, *J* = 8.62 Hz, 2H, C6H4), 8.03 (s, 1H, CH).

**(ii) Reaction of *p*-ClC6H4N3 with MeC(O)OCH2CCH in water**

*p*-Chloroazidobenzene (0.381 g, 2.482 mmol) and MeC(O)OCH2CCH (0.252 g, 2.571 mmol) were mixed with water (10 ml). Potassium ascorbate (0.25 mmol) prepared from ascorbic acid and KOH was added, followed by crystalline CuSO45H2O (6.6 mg, 0.026 mmol). The mixture was stirred at r.t. for 5 h and the precipitate was collected by filtration. After washing the precipitate with water (220 ml), it was dried in the air and then under vacuum to afford 0.48 g (76.2 %) of product as pale yellow solid. The 1H NMR spectrum is the same as that of the compound mentioned above.

**(iii) Reaction of PhN3 with PhCCH in water**

The same procedure as for (ii) was used. The reaction of PhN3 (0.34 g, 2.857 mmol) with PhCCH (0.27 g, 2.647 mmol) in the presence of potassium ascorbate (0.25 mmol) and CuSO45H2O (0.026 mmol) for 12 h gave, after similar work-up, 1,4-diphenyl-1,2,3-triazole (0.5075 g, 86.7 %). 1H NMR (CDCl3): 7.19-7.50 (m, 6H, Ph), 7.72 (d, *J* = 7.61 Hz, 2H, Ph), 7.85 (d, *J* = 7.15 Hz, 2H, Ph), 8.13 (s, 1H, CH).

**(iv) Reaction of *p*-MeOC6H4N3 with PhCCH in water**

The same procedure as for (ii) was used. The reaction of *p*-MeOC6H4N3 (0.54 g, 3.624 mmol) with PhCCH (0.37 g, 3.627 mmol) in the presence of potassium ascorbate (0.36 mmol) and CuSO45H2O (0.036 mmol) for 12 h gave, after similar work-up, corresponding 1,4-disubstituted 1,2,3-triazole (0.81 g, 89 %). 1H NMR (CDCl3): 3.88 (s, 3H, Me), 7.04 (d, *J* = 8.95 Hz, 2H, Ar), 7.36 (d, *J* = 7.32 Hz, 1H, Ar), 7.46 (t, *J* = 7.11 Hz, 2H, Ar), 7.68 (d, *J* = 8.95 Hz, 2H, Ar), 7.90 (d, *J* = 7.17 Hz, 2H, Ar), 8.11 (s, 1H, CH).

**(v) Reaction of PhN3 with CHCC(O)OEt in water**

The same procedure as for (ii) was used. The reaction of PhN3 (0.34 g, 2.857 mmol) with CHCC(O)OEt (0.25 g, 2.551 mmol) in the presence of potassium ascorbate (0.25 mmol) and CuSO45H2O (0.026 mmol) overnight gave, after similar work-up, corresponding 1,4-disubstituted 1,2,3-triazole (0.38 g, 64.4 %). 1H NMR (CDCl3): 1.44 (t, *J* = 7.01 Hz, 3H, Me), 4.47 (q, *J* = 7.00 Hz, 2H, CH2), 7.47-7.58 (m, 3H, Ph), 7.75 (d, *J* = 7.90 Hz, 2H, Ph), 8.51 (s, 1H, CH).
